# Supplementary material
Source: PubMed Central journal article supplement (PMC3105166)
Supplement: NIHMS249425-supplement-01.pdf [file NIHMS249425-supplement-01.pdf]

## Supporting Information

| Region | $\hat{\pi}_0$ | 95% CI      | $n_0$ | $n$ | $\hat{\pi}_I$ | 95% CI      | $n_I$ | $n_C$ |
|--------|---------------|-------------|-------|-----|---------------|-------------|-------|-------|
| AI     | 0.45          | (0.19,0.74) | 4     | 9   | 0.86          | (0.54,1.00) | 5     | 0     |
| Hp.A   | 0.62          | (0.29,0.90) | 4     | 6   | 0.75          | (0.29,0.99) | 2     | 0     |
| PI     | 0.40          | (0.14,0.70) | 3     | 8   | 0.71          | (0.36,0.96) | 4     | 1     |
| T      | 0.67          | (0.28,0.95) | 3     | 4   | 0.67          | (0.16,0.99) | 1     | 0     |
| S1     | 0.71          | (0.36,0.96) | 4     | 5   | 0.67          | (0.16,0.99) | 1     | 0     |
| S2     | 0.71          | (0.36,0.96) | 4     | 5   | 0.67          | (0.16,0.99) | 1     | 0     |
| Pfc    | 0.38          | (0.15,0.65) | 4     | 11  | 0.67          | (0.35,0.91) | 5     | 2     |
| Acc    | 0.42          | (0.17,0.69) | 4     | 10  | 0.62          | (0.29,0.90) | 4     | 2     |
| Pcc    | 0.33          | (0.05,0.72) | 1     | 4   | 0.6           | (0.19,0.93) | 2     | 1     |
| Th     | 0.45          | (0.19,0.74) | 4     | 9   | 0.57          | (0.22,0.88) | 3     | 2     |
| Pag    | 0.33          | (0.01,0.84) | 0     | 1   | 0.33          | (0.01,0.84) | 0     | 1     |

**Table S1 - Estimates of the probability of NS ( $\pi_0$ ) and the probability of IBS>Control( $\pi_I$ ):** Includes corresponding 95% credible intervals, for binomial models with uniform priors (upper and lower bounds). Abbreviations:  $n$  – Number of studies reporting; CI – credible interval; Acc – Anterior Cingulate Cortex, PFC – Prefrontal Cortex; AI/PI – Anterior/Posterior Insula; Hp/Am – Hippocampus/Amygdala (reported together); S1/S2– Somatosensory Area I & II; Pcc – Posterior Cingulate Cortex; T – Temporal Lobule; PAG – Periaqueductal grey matter.

| n  | K       |         |         |         |         |         |         |         |
|----|---------|---------|---------|---------|---------|---------|---------|---------|
|    | 0       | 1       | 2       | 3       | 4       | 5       | 6       | 7       |
| 4  | 0.15714 | 0.52190 | 0.31666 | 0.00430 |         |         |         |         |
| 5  | 0.07732 | 0.35461 | 0.47214 | 0.09593 |         |         |         |         |
| 6  | 0.03790 | 0.21882 | 0.44508 | 0.27864 | 0.01956 |         |         |         |
| 7  | 0.01885 | 0.12666 | 0.34371 | 0.39195 | 0.11644 | 0.00239 |         |         |
| 8  | 0.00943 | 0.07357 | 0.23511 | 0.38813 | 0.25815 | 0.03545 | 0.00016 |         |
| 9  | 0.00463 | 0.03956 | 0.15481 | 0.31996 | 0.34393 | 0.12859 | 0.00852 |         |
| 10 | 0.00226 | 0.02202 | 0.09813 | 0.24048 | 0.34179 | 0.24021 | 0.05346 | 0.00165 |

**Table S2 - Probability of border sum totals:** Probability that the minimum border sum  $U$  for  $n=4, 5, \dots, 10$  is equal to  $k=0, 1, \dots, 7$ ; Under the null hypothesis  $P_0$ . Based on 100,000 simulated matrices  $N_0$ , each based on a different randomly chosen  $P_0$ .
